# Supplementary material for: Clinical characteristics on admission predict in-hospital fatal outcome in patients aged ≥75 years with novel coronavirus disease (COVID-19): a retrospective cohort study
Source: Springer Nature journal article supplement (doi:10.1186/s12877-020-01921-0), 2020-11-30

**Supplementary Table Reference range of laboratory values**

| <b>Laboratory indicators</b>             | <b>Reference Range</b>                          |
|------------------------------------------|-------------------------------------------------|
| White blood cell count- $\times 10^9/L$  | 3.5~9.5                                         |
| Neutrophil count - $\times 10^9/L$       | 1.8~6.3                                         |
| Lymphocyte count - $\times 10^9/L$       | 1.10~3.20                                       |
| Red blood cell count- $\times 10^{12}/L$ | 3.80~5.10                                       |
| Haemoglobin- g/L                         | 115~150                                         |
| Platelet count - $\times 10^9/L$         | 125~350                                         |
| C-reactive protein – mg/L                | 0.00~5.00                                       |
| PCT-ng/L                                 | 0~500                                           |
| D-dimer-mg/L                             | 0.00~1.00                                       |
| ALT-IU/L                                 | 7~45                                            |
| AST-IU/L                                 | 13~35                                           |
| TB- $\mu\text{mol}/L$                    | 2.0~24.0                                        |
| BUN-mmol/L                               | 2.5~7.1                                         |
| Cr- $\mu\text{mol}/L$                    | 44~97                                           |
| LDH- IU/ L                               | 114~250                                         |
| CK- IU/L                                 | 0~170                                           |
| CK-MB- IU/L                              | 0.0~24.0                                        |
| Hs-Tnl- ng/L                             | 0~26                                            |
| NT-proBNP-ng/L                           | <450(<50yrs)<br><900(50~75yrs)<br><1800(>75yrs) |

## Supplementary Figure

1. Barcode links to STONP online tool.

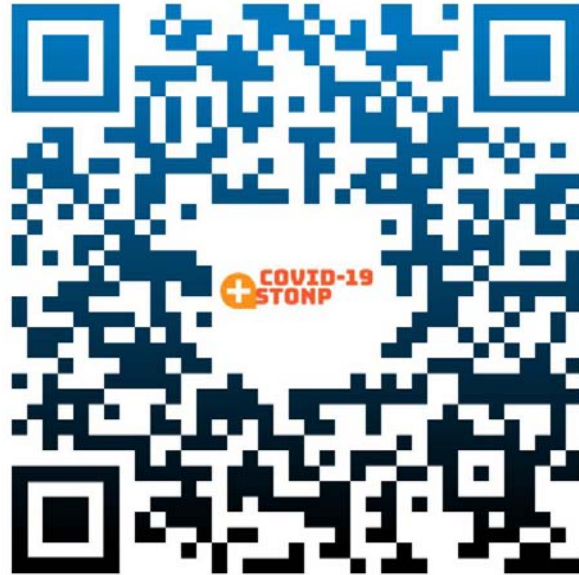

2. Barcode links to STONP App (Android system only).

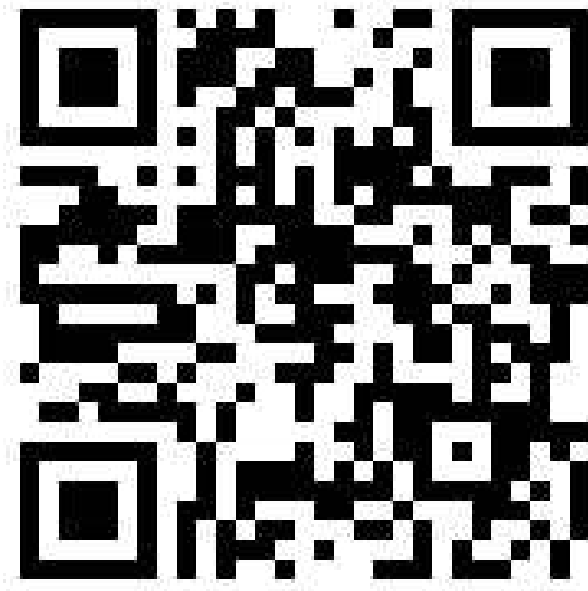

Supplement: MOESM1 [file 18641782]
